# Supplementary material for: The effect of weight loss following 18 months of lifestyle intervention on brain age assessed with resting-state functional connectivity
Source: eLife. 2023 Apr 6;12:e83604. doi: 10.7554/eLife.83604 (PMC10174688; doi:10.7554/eLife.83604)
Supplement: Figure 3—source data 1. — A processed version of the data that includes participants’ demographics, predicted, and observed age and weight values for T0 and T18. [file elife-83604-fig3-data1.csv]

	Time_BetweenMRI	BMI_0	BMI_18	age	gender	func_age_pred_t0	func_age_pred_t18
13.0	1.609856263	34.73001122	33.68851146	50.93	F	49.60289005893486	47.6991796901976
22.0	1.916495551	29.45821855	27.32782369	50.35	M	48.48116036373105	50.45799084787664
23.0	1.587953457	29.50355639	27.58020032	52.68	M	56.79215777403535	44.65202635135216
24.0	1.538672142	29.8615917	27.95847751	64.94	M	49.408985393086255	63.556681463715805
27.0	1.483915127	27.99036281	26.39597506	49.93	M	49.91939086986075	54.21639655372011
34.0	1.897330595	30.29142328	29.65303712	52.93	M	56.88591629257947	60.80538091230574
41.0	1.935660507	30.52013635	28.40550436	45.3	M	51.251046173687605	45.58254367647512
44.0	1.609856263	27.4691358	27.25308642	46.92	M	50.42112269926066	55.77594096038249
46.0	1.533196441	29.06976744	25.68956193	59.93	M	50.73335959127515	48.00426893550964
55.0	1.61369863	30.45316422	30.32104637	47.03	M	50.37601091953332	53.57598455782697
60.0	1.70568104	29.19753086	28.45679012	60.2	M	53.29774877821993	48.501737547311656
61.0	1.752224504	29.74580855	29.94862088	53.93	M	52.09770251123801	61.21891108770206
63.0	1.746748802	31.35135135	26.1504748	34.92	M	56.00423271660805	48.882070812591074
81.0	1.516769336	29.76265623	30.2360813	50.0	M	51.68326128805156	48.52929346151868
83.0	1.656399726	29.70363193	28.40054796	52.93	M	52.71222660644156	51.56657928602914
89.0	1.859000684	31.48148148	32.28395062	43.58	M	54.91927693263921	54.55736200143673
91.0	2.088980151	31.83421242	30.99154209	56.93	M	49.785142854324505	53.28708032695342
94.0	1.571526352	25.70934256	26.64359862	42.92	M	58.14642313722479	55.64244406358104
96.0	1.782340862	32.99382716	31.2962963	50.27	M	54.07822226983268	52.08795026647717
99.0	1.442847365	28.46133045	26.39940508	44.92	M	54.43404272446325	58.80758400079068
101.0	1.711156742	30.00918274	30.81726354	43.58	M	49.54584567468508	51.76354042621571
102.0	1.590691307	33.33231586	30.95143616	47.46	M	55.1408856124455	51.100633703177
105.0	1.749486653	34.14007572	30.05002704	52.93	M	52.02497843693654	58.09708119217929
106.0	1.524982888	29.2036191	29.47236406	51.83	M	39.98819766480729	42.21254340281689
107.0	1.49486653	24.97971877	25.1825311	42.12	M	51.14829106709229	46.12300706570295
108.0	1.935660507	30.95129722	28.29032597	45.4	M	55.07932356942358	49.55049764042954
113.0	1.765913758	24.8902376	26.37525826	49.68	F	52.57148136542914	49.77682581887433
119.0	1.87816564	29.64897959	26.31836735	39.92	M	52.13003748051157	52.68168555708312
124.0	1.87816564	30.68310658	27.14002268	38.92	M	57.257453248933935	53.2982336932154
125.0	1.782340862	27.28988242	27.43504137	61.94	M	60.10784507625995	58.67075509494796
126.0	1.859000684	30.25104163	28.18528763	35.92	M	55.25634983537676	52.41101159834376
135.0	1.954825462	31.6865656	26.57469977	52.93	M	56.39328886080431	53.64031419411047
148.0	1.659137577	31.87305496	31.56526795	56.93	M	55.29979040770726	48.12279421530749
150.0	1.916495551	31.25625554	28.45377334	55.93	M	52.39194982877986	49.62812132541681
151.0	1.653661875	31.03764922	29.60514233	62.69	M	55.86245880580417	50.45975996936137
152.0	1.87816564	30.66678611	28.87515304	62.94	M	56.25743397987524	59.30254683216856
156.0	1.675564682	28.17816635	28.88705104	37.95	M	47.39619512520369	47.075440755807215
157.0	1.744010951	31.08940598	26.17383255	43.77	M	59.19520662941413	48.29178977910279
163.0	1.763175907	31.95873142	28.81474924	36.92	M	51.121648740801135	45.5115330523009
165.0	1.973990418	34.60983817	36.81301074	35.92	F	49.107956244898304	51.67543480308188
166.0	1.801505818	27.41445369	26.48962875	57.93	M	54.02197532314871	53.08322677062311
170.0	2.020533881	33.64439312	32.70809276	59.93	M	54.11914064217835	56.471213003846486
173.0	2.069815195	32.61898323	33.22742023	37.92	M	48.90515188163011	48.91828792759824
176.0	1.839835729	31.62627648	30.33074226	37.92	M	57.80326133612797	51.35999274513016
180.0	1.87816564	30.81597222	30.40907118	42.92	M	58.96732078364233	60.870537287448805
182.0	1.839835729	28.42975207	28.39302112	60.93	M	55.1292987581277	47.23837837188816
188.0	1.678302533	25.50352708	24.83322162	52.93	M	52.2982027938548	53.47142992955127
190.0	1.839835729	26.953125	29.0234375	39.92	F	58.77812454974851	63.22913493194858
198.0	1.839835729	29.74433893	29.18918919	58.93	M	48.66814668470627	44.58209887962442
204.0	2.012320329	31.18367347	31.28163265	50.93	M	54.005641766317616	50.87488441865319
205.0	1.820670773	33.46938776	33.07755102	61.94	M	56.74558384544218	59.67220319153502
206.0	1.716632444	30.32334259	28.91889304	36.92	M	50.141760486785145	48.97364579729023
210.0	1.659137577	33.51458568	31.3600766	40.92	M	50.58796367481323	57.09012411837641
212.0	1.954825462	31.18543388	31.41141529	42.06	M	51.17230937776661	44.58102759598936
213.0	1.711156742	30.19732567	28.38480216	69.94	M	57.87534294438785	53.37008987682189
216.0	1.724845996	33.95428722	32.17069626	45.92	M	51.804803800188765	52.55276257112962
229.0	1.935660507	31.33852056	28.86442683	64.94	M	51.64378994396072	50.16880043756896
238.0	1.820670773	27.46122449	24.19591837	73.94	M	57.84073517422274	56.93571833472792
239.0	1.631759069	28.6365438	26.45659929	67.94	M	51.61253564551992	52.91185178952894
241.0	1.648186174	26.79158448	24.90138067	78.95	M	56.66940049596997	53.887076066169406
243.0	1.514031485	30.44444444	29.51111111	66.94	F	56.73925875960995	52.82749271663747
248.0	1.839835729	33.78733238	28.25531319	55.93	M	61.13425613419041	54.994315073368746
254.0	1.820670773	29.41358025	24.19753086	63.94	M	57.83832981223063	53.11466607798478
255.0	1.70568104	30.13001042	26.2335558	43.92	M	49.0427619640238	47.95846704489924
256.0	1.819178082	28.99653979	26.2283737	62.94	M	58.62599776835996	56.69034878767809
260.0	1.935660507	29.31985649	28.66401759	61.94	F	53.59752809691376	49.08301780608441
262.0	1.976728268	37.32329238	37.95085216	41.92	M	47.83822902094925	50.06959675104371
266.0	1.609856263	37.4985533	32.5604722	52.93	M	57.75652411376844	54.37164174670568
268.0	1.648186174	28.30599506	26.4915082	58.93	M	52.10343941118118	58.65543156496994
269.0	1.782340862	28.27995868	27.34375	34.92	M	44.79777059854191	47.88048118386951
275.0	1.596167009	31.90725351	29.71854588	71.94	M	56.20732096396801	48.56051644893528
277.0	1.70568104	30.37147828	31.01248436	41.92	M	49.26285050120208	56.10371113172079
282.0	1.590691307	28.28341855	25.53688824	47.92	M	56.80644061122369	50.12572411404439
284.0	2.012320329	29.64897959	29.3877551	34.92	M	52.443753937402	45.804093710815685
285.0	1.973990418	29.20697053	30.18555459	64.94	M	54.81377639481448	60.82441868788435
289.0	1.754962355	28.88697373	26.93989594	45.26	M	44.063609253031686	55.31846633564163
290.0	1.686516085	27.86895594	26.19618735	41.92	M	53.50706202294863	57.66902499073802
293.0	1.961643836	31.27401517	29.63680711	48.92	M	51.8576341786928	53.71215260598603
294.0	1.763175907	29.00037618	24.96494648	45.92	M	52.83015690536746	42.53845898708403
295.0	1.905544148	34.15365955	32.30233969	53.93	M	47.01640418717908	50.84433051991215
296.0	1.820670773	28.7964876	24.34142562	33.92	M	49.55276362836268	49.49892851285638
299.0	1.686516085	33.08764621	32.48678096	41.92	F	52.23771887162529	58.555547981728914
301.0	1.837097878	29.55560923	30.21978022	53.93	M	53.920093582524125	56.43040545285989
305.0	1.552361396	29.99736535	29.65862471	48.92	M	55.3353988829529	51.89446593190728
306.0	1.935660507	27.77777778	28.91975309	56.93	M	49.56267608264936	55.301923867117786
313.0	1.859000684	29.51335454	30.43671557	62.94	M	56.57255163478102	56.656469507000445
314.0	1.839835729	29.98299118	29.6269926	59.93	M	54.82790129748083	66.46032311811078
320.0	1.859000684	32.54368673	32.41003709	45.92	M	54.60585455904248	53.82693935931915
326.0	1.911019849	29.52833928	27.61263047	54.93	M	53.45596934015866	47.917279581425305
327.0	1.642710472	25.78077378	24.34651655	81.95	M	49.32768107003802	51.941987285099096
328.0	1.741273101	31.8388564	33.30939434	66.94	M	47.253680022428576	53.09645267308851
332.0	1.845311431	25.4580659	25.96005594	52.93	M	54.69708141198285	54.339750915840696
334.0	1.820670773	26.9101534	25.50766983	50.93	M	53.40547745724001	51.6065874140097
335.0	1.73853525	25.97867957	22.96276389	45.92	M	47.022488187441965	48.14127881691646
339.0	1.902806297	30.18008177	30.14887176	64.94	M	52.0991476337747	59.403756098711234
342.0	1.839835729	33.75	34.4921875	62.94	F	53.66191565861372	58.25364123851149
343.0	1.724845996	29.8684069	30.47796622	48.92	M	49.696970092384106	53.14148258048408
351.0	1.604380561	25.1338489	24.9107674	43.92	F	39.18903591795085	48.79310388929754
356.0	1.757700205	29.921875	30.4296875	48.92	M	53.84489433007795	46.98948528561949
365.0	1.623545517	32.95178633	27.47427448	42.92	M	47.565366131313525	44.926192259400686
372.0	1.763175907	29.65397924	27.64705882	36.92	M	52.60724441475894	54.99641219480471
375.0	1.412731006	28.53745541	24.01241908	51.93	M	52.553231682697295	51.38238048955188
