# Supplementary material for: The effect of weight loss following 18 months of lifestyle intervention on brain age assessed with resting-state functional connectivity
Source: eLife. 2023 Apr 6;12:e83604. doi: 10.7554/eLife.83604 (PMC10174688; doi:10.7554/eLife.83604)
Supplement: Supplementary file 1. — A table describing the details of the intervention for each of the three groups. [file elife-83604-supp1.xlsx]

## Sheet: SI table 1
SI Table 3 – Intervention outline by group
Green-MED		MED	HDG
18-months group sessions in the workplace, weekly for the first month and monthly thereafter				Lifestyle group sessions, including PA
18 months free gym membership
18 months of PA educational sessions
45-60 minutes of aerobic training + resistance training, 3-4 times/week
Limit dietary cholesterol, trans-fat, saturated fat, sugars, and salt and increase intake of vegetables				General dietary guidance
1500-1800 kcal/day for men, 1200-1400 kcal/day for women			Guidelines for a healthy MED diet with no specific recipes or calorie restriction	Energy, kcal/day
~40% mainly PUFA and MUFA				Total fat, % of daily consumption
Less than 40 gr/day in the first 2 months with increased gradual intake for up to 80 gr/day				Carbohydrates, gr/day
Less/Avoid red and processed meats. Reduced poultry intake				Specific recommendations
+1240 mg/day	+440 mg/day			Polyphenols, mg/day
[source: provided walnuts (28 g/day), green tea (3-4 cups/day), Wolffia globosa duckweed (Mankai) shake (100 g frozen cubes)]	[source: provided
	walnuts (28g/day]
