# Supplementary material for: The effect of weight loss following 18 months of lifestyle intervention on brain age assessed with resting-state functional connectivity
Source: eLife. 2023 Apr 6;12:e83604. doi: 10.7554/eLife.83604 (PMC10174688; doi:10.7554/eLife.83604)
Supplement: Supplementary file 2. — A table describing the Pearson’s correlation between baseline characteristics and age, predicted age, and brain age gap. [file elife-83604-supp2.xlsx]

## Sheet: SI table 2
SI Table 1. Association between baseline characteristics and age, predicted age, and brain-age gap
	Age		Brain age		T0 brain age gap
					(bias corrected)
	r	p-value	r	p-value	r	p-value
Age	1	>0.001	0.244	0.013	>0.001	<0.999
WC (cm)	0.067	0.502	0.055	0.582	0.04	0.691
AST (U/L)	-0.019	0.85	0.04	0.687	0.046	0.643
ALT (U/L)	-0.039	0.696	0.124	0.214	0.138	0.167
GGT (U/L)	0.071	0.502	0.1	0.342	0.085	0.416
ALKP (mg/dL)	0.167	0.093	0.18	0.071	0.143	0.151
FGF 21 (pg/mL)	0.101	0.313	0.211	0.034	0.192	0.053
Glucose (mg/dL)	0.288	0.003	0.053	0.602	-0.018	0.855
Cholesterol (mg/dL)	-0.101	0.312	-0.024	0.811	0.001	0.994
SSC (cm²)	-0.19	0.063	-0.283	0.005	-0.249	0.014
DSC (cm²)	-0.206	0.041	-0.04	0.696	0.007	0.944
HOC	-0.684	0	-0.255	0.01	-0.09	0.368
