# Supplementary material for: The effect of weight loss following 18 months of lifestyle intervention on brain age assessed with resting-state functional connectivity
Source: eLife. 2023 Apr 6;12:e83604. doi: 10.7554/eLife.83604 (PMC10174688; doi:10.7554/eLife.83604)
Supplement: Supplementary file 3. — A table describing the Pearson’s correlation and partial correlation of brain age attenuation and the change in the measured biomarkers. [file elife-83604-supp3.xlsx]

## Sheet: SI table 3
SI Table 2 – Correlation and partial correlation of brain age attenuation and biomarkers
	r	p-value	r (age-corrected)	p-value (age-corrected)	r (baseline brain age -corrected)	p-value (baseline brain age-corrected)	r (∆BMI-corrected)	p-value (∆BMI-corrected)
∆BMI (kg/m²)	0.319	0.001	0.319	0.001	0.266	0.007	-0.041	0.682
∆WC (cm)	0.198	0.046	0.198	0.046	0.171	0.085	-0.042	0.674
∆AST (U/L)	0.084	0.403	0.092	0.359	0.053	0.599	0.052	0.603
∆ALT (U/L)	0.247	0.012	0.268	0.007	0.197	0.047	0.135	0.176
∆GGT (U/L)	0.257	0.013	0.264	0.011	0.237	0.022	0.157	0.133
∆ALKP (mg/dL)	0.263	0.007	0.281	0.004	0.23	0.02	0.233	0.018
∆FGF 21 (pg/mL)	0.122	0.221	0.123	0.217	0.094	0.346	0.044	0.659
∆Chemerin (ng/mL)	0.288	0.003	0.29	0.003	0.219	0.027	0.245	0.013
∆Glucose (mg/dL)	-0.019	0.853	-0.005	0.958	-0.101	0.323	-0.088	0.389
∆HOMA IR	0.092	0.369	0.107	0.293	-0.018	0.862	-0.027	0.789
∆HbA1c (%)	0.187	0.059	0.198	0.046	0.164	0.099	0.09	0.371
∆Cholesterol (mg/dL)	-0.05	0.618	-0.048	0.629	-0.008	0.934	-0.02	0.84
∆HDL-C (mg/dL)	-0.273	0.005	-0.272	0.006	-0.228	0.021	-0.144	0.149
∆LDL-C (mg/dL)	0.033	0.738	0.035	0.73	0.069	0.493	0.06	0.551
∆Triglycerides (mg/dL)	0.177	0.075	0.18	0.071	0.166	0.095	0.082	0.412
∆Liver fat (cm²)	0.259	0.01	0.264	0.008	0.225	0.025	0.045	0.659
∆VAT (cm²)	0.32	0.002	0.334	0.001	0.297	0.004	0.178	0.085
∆DSC (cm²)	0.201	0.05	0.202	0.049	0.215	0.037	-0.024	0.818
∆SSC (cm²)	0.25	0.013	0.246	0.014	0.232	0.022	0.007	0.947
∆HOC	-0.296	0.003	-0.294	0.003	-0.346	<0.001	-0.269	0.007
* All delta values were calculated as the value at T0 minus the value at T18
