# Supplementary material for: The effect of weight loss following 18 months of lifestyle intervention on brain age assessed with resting-state functional connectivity
Source: eLife. 2023 Apr 6;12:e83604. doi: 10.7554/eLife.83604 (PMC10174688; doi:10.7554/eLife.83604)
Supplement: Supplementary file 4. — A table describing the Kendall’s tau correlation coefficient of brain age attenuation and food consumption, as reported using a food frequency questionnaire (FFQ). [file elife-83604-supp4.xlsx]

## Sheet: SI table 4
SI Table 4 –Relation between brain age attenuation and food consumption
	Correlation	p value	p (FDR)
	coefficient (Kendall's tau)
ΔSweets and beverages	-0.231	0.005	0.021
ΔNuts seeds	-0.008	0.925	0.925
ΔEgg milk	-0.02	0.8	0.925
ΔBeef	-0.016	0.842	0.925
ΔProcessed food	-3.131*	0.002	0.019
ΔGreen tea	0.081	0.319	0.511
ΔWalnuts	-0.128	0.121	0.241
Weekly Mankai	-0.325	0.085	0.227
* Processed food was computed with an unpaired t-test (had only two-level)
